# Supplementary material
Source: PubMed Central journal article supplement (PMC4702721)
Supplement: JCM.02171-15_zjm999094669so6.pdf [file JCM.02171-15_zjm999094669so6.pdf]

clustalo-2-Alignment\_DT SP

CLUSTAL O(1.2.1) multiple sequence alignment of cytochrome c oxidase subunit I-genes from cysticercosis cases (case#) and *T. solium* GenBank sequence (AB066489).

Asterix denotes identical nucleotide.

*T. crassiceps* (#9)

-----  
*T. serialis* (#6)

-----  
*T. solium* (#11)

-----AT  
*T. solium* (#12)

-----T  
*T. solium* (#10)

-----AT  
*T. solium* (AB066489)

GATCCGTTAGGAGGTGGTGATCCTGTTTTGTTTCAACATATGTTTTGATTTTTGGTCAT

*T. crassiceps* (#9)

CCTGAGGTTTATGTTTTGATATTGCCGGGTTTTGGAATTATTAGACATATTTGTTTGAAA

*T. serialis* (#6)

CCTGAGGTTTATGTTTTAATTCTTCCGGGTTTTGGTATAATTAGTCATATATGTTTAAGA

*T. solium* (#11)

CCTGAGGTTTATGTGTTAATTCTTCCGGGTTTTGGTATAATTAGTCATATATGTTTGAGT

*T. solium* (#12)

CCTGAGGTTTATGTGTTAATTCTTCCGGGTTTTGGTATAATTAGTCATATATGTTTGAGT

*T. solium* (#10)

CCTGAGGTTTATGTGTTAATTCTTCCGGGTTTTGGTATAATTAGTCATATATGTTTGAGT

*T. solium* (AB066489)

CCCGAGGTTTATGTGTTAATTCTTCCGGGTTTTGGTATAATTAGTCATATATGTTTGAGT

\*\* \*\*\*\*\* \*\* \* \* \*\* \*\* \*\*\*\*\* \* \*\*\*\*\* \*\*\*\*\* \*\*\*\*\* \*

*T. crassiceps* (#9)

ATAAGTATGAATTGTGATTCTTTGGTTTTTATGGATTGTTATTTGCTATGTTTTCAATA

*T. serialis* (#6)

ATAAGTATGTGCCAGACGCTTTTGGTTTTTATGGTTTGTATTTGCTATGTTCTCAATA

*T. solium* (#11)

ATAAGTATGTGTTCTGATGCTTTTGGCTTTTATGGGTTATTGTTTGCTATGTTTTCGATA

*T. solium* (#12)

ATAAGTATGTGTTCTGATGCTTTTGGCTTTTATGGGTTATTGTTTGCTATGTTTTCATA

*T. solium* (#10)

ATAAGTATGTGTTCTGATGCTTTTGGCTTTTATGGGTTATTGTTTGCTATGTTTTCATA

*T. solium* (AB066489)

ATAAGTATGTGTTCTGATGCTTTTGGCTTTTATGGGTTATTGTTTGCTATGTTTTCATA

\*\*\*\*\* \* \*\* \*\*\*\*\* \*\*\*\*\* \*\* \*\* \*\*\*\*\* \*\*\*\*\* \*\*

\*\*\*

clustalo-2-Alignment\_DT SP

T. crassiceps (#9)  
GTTTGTTTAGGTAGGAGTGTGGGGTCATCATATGTTTACGGTTGGTTAGATGTTAAG  
T. serialis (#6)  
GTGTGTTTAGGAAGGAGTGTATGGGGTCATCATATGTTTACAGTTGGGTTAGATGTTAAG  
T. solium (#11)  
GTATGTTTAGGAAGAAGTGTATGAGGGCATCATATGTTTACGGTTGGGTTAGATGTTAAG  
T. solium (#12)  
GTATGTTTAGGAAGAAGTGTGTGAGGACATCATATGTTTACGGTTGGGTTAGATGTTAAG  
T. solium (#10)  
GTATGTTTAGGAAGAAGTGTGTGAGGACATCATATGTTTACGGTTGGGTTAGATGTTAAG  
T. solium (AB066489)  
GTATGTTTAGGAAGAAGTGTGTGAGGACATCATATGTTTACGGTTGGGTTAGATGTTAAG  
\*\* \*\*\*\*\* \*\* \*\*\*\*\* \*\* \*\* \*\*\*\*\* \*\*\*\*\* \*\*\*\*\*

\*\*\*\*\*

T. crassiceps (#9)  
ACTGCTGTTTTTTTTAGTTCTGTTACTATGATTATAGGAGTACCTACAGGTATAAAGGTG  
T. serialis (#6)  
ACTGCTGTATTTTTTAGCTCAGTTACTATGATAATAGGAGTACCAACAGGAATAAAGGTT  
T. solium (#11)  
ACGGCTGTATTTTTTAGTTCTGTTACTATGATAATTGGAGTGCCTACGGGGATTAAGGTT  
T. solium (#12)  
ACGGCTGTATTTTTTAGTTCTGTTACTATGATAATTGGAGTGCCTACGGGGATTAAGGTT  
T. solium (#10)  
ACGGCTGTATTTTTTAGTTCTGTTACTATGATAATTGGAGTGCCTACGGGGATTAAGGTT  
T. solium (AB066489)  
ACGGCTGTATTTTTTAGTTCTGTTACTATGATAATTGGAGTGCCTACGGGGATTAAGGTT  
\*\* \*\*\*\*\* \*\*\*\*\* \*\* \*\*\*\*\* \*\* \*\*\*\*\* \*\* \*\* \*\* \*\* \*\* \*\*\*\*\*

T. crassiceps (#9)  
TTTACTTGATTGTATATGCTTTTAAATTCGCGTGTGAACAAGAGTGATCCTATATTGTGG  
T. serialis (#6)  
TTTACTTGGCTTTATATGTTATTAATTCGCGTGTGAATAAGAGTGATCCTATATTGTGG  
T. solium (#11)  
TTCACCTGGCTTTATATGCTTTTAAAATCTCGTGTGAATAAGAGTGATCCGGTTTTATGA  
T. solium (#12)  
TTTACTTGGCTTTATATGCTTTTAAAATCTCGTATTAATAAGAGTGATCCGGTTTTATGA  
T. solium (#10)  
TTTACTTGGCTTTATATGCTTTTAAAATCTCGTATTAATAAGAGTGATCCGGTTTTATGA  
T. solium (AB066489)  
TTTACTTGGCTTTATATGCTTTTAAAATCTCGTATTAATAAGAGTGATCCGGTTTTATGA  
\*\* \*\*\*\*\* \* \*\*\*\*\* \* \*\*\*\*\* \*\* \*\*\* \* \*\* \*\*\*\*\* \*\*\*\*\* \* \*\* \*\*

T. crassiceps (#9)  
TGAATTGTTTCTTTTATAGTTTTATTACGTTTGGTGGTGTACTGGAATAGTATTGTCT  
T. serialis (#6)  
TGGATAGTTTCTTTTATAGTATTGTTTACTTTTGGTGGTGTAACTGGGATTGTATTGTCT  
T. solium (#11)
