# Supplementary material
Source: PubMed Central journal article supplement (PMC4702721)

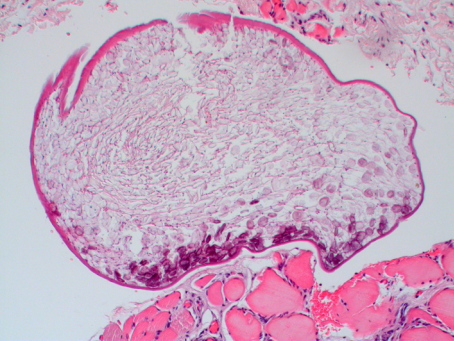

Supplement: JCM.02171-15_zjm999094669so2.pdf [file JCM.02171-15_zjm999094669so2.pdf]

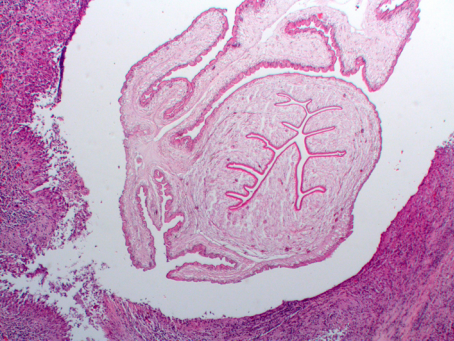

Supplement: JCM.02171-15_zjm999094669so3.pdf [file JCM.02171-15_zjm999094669so3.pdf]

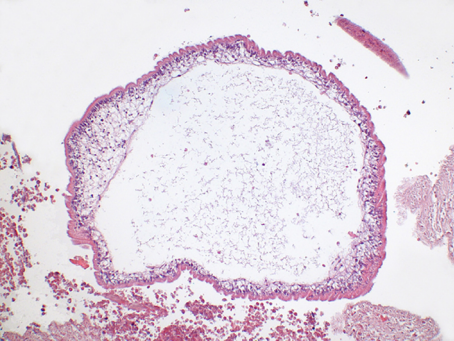

Supplement: JCM.02171-15_zjm999094669so4.pdf [file JCM.02171-15_zjm999094669so4.pdf]

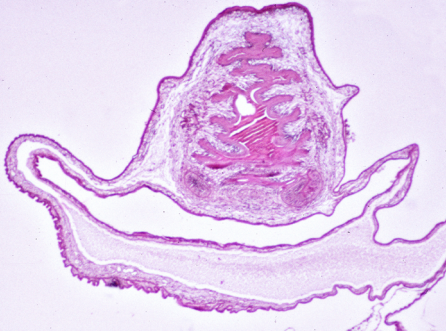

Supplement: JCM.02171-15_zjm999094669so5.pdf [file JCM.02171-15_zjm999094669so5.pdf]
